# Supplementary material for: Delta-like 4/Notch signaling promotes ApcMin/+ tumor initiation through angiogenic and non-angiogenic related mechanisms
Source: BMC Cancer. 2017 Jan 13;17:50. doi: 10.1186/s12885-016-3036-0 (PMC5237288; doi:10.1186/s12885-016-3036-0)
Supplement: Additional file 3: Table S2. — Summary of sites of Notch pathway protein expression in the normal small and large intestine. Dll1, 3 and 4 Jagged1 and 2, Notch1-4, Hes1 and 5 protein expression pattern (indicated by an x) in the small intestine crypts and villus epithelium, in the bottom and top of the large intestine crypts and in the lamina propria of the normal WT intestine of C57BL/6 mice at 18 weeks of age. One experiment with n = 2 per group, 3 slides per mouse, and 2 sections per slide. (XLSX 38 kb) [file 12885_2016_3036_MOESM3_ESM.xlsx]

## Sheet: Additional file 1 Table 1.csv
	small intestine						large intestine
	crypts			villi		lamina propria	crypts bottom	crypts top		lamina propria
	undifferentiated cells	Paneth cells	goblet cells	enterocytes	goblet cells			colonocytes	goblet cells
Dll1	X	X			X	X			X	X
Dll3				X (diffusely)		X		X (diffusely)		X (diffusely)
Dll4	X	X			X	X			X	X
Jagged1	X (diffusely)			X (diffusely)		X	X (diffusely)	X (diffusely)		X
Jagged2	X			X		X	X			X
Notch1	X	X		X		X	X			X
Notch2	X	X				X	X			X
Notch3	X			X		X	X			X
Notch4			X		X	X	X		X	X
Hes1	X	X		X		X	X	X (diffusely)		X
Hes5	X	X		X (diffusely)		X	X (diffusely)	X (diffusely)		X
