# Supplementary material for: Delta-like 4/Notch signaling promotes Apc Min/+ tumor initiation through angiogenic and non-angiogenic related mechanisms
Source: Springer Nature journal article supplement (doi:10.1186/s12885-016-3036-0), 2017-01-13

SI ADENOMA

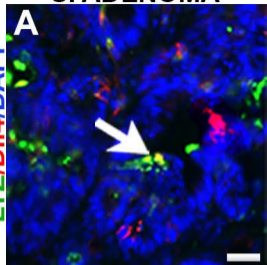

LI ADENOMA

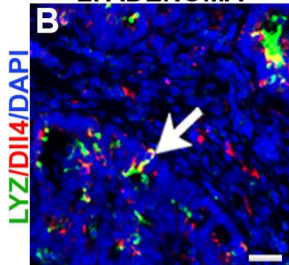

SI ADENOMA

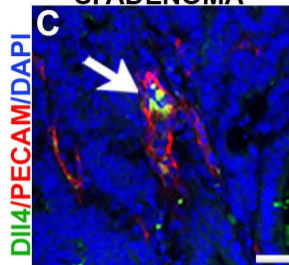

LI ADENOMA

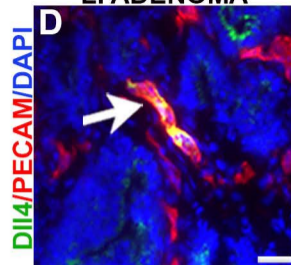

NORMAL SI

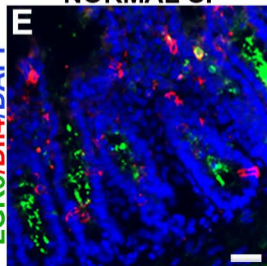

NORMAL LI

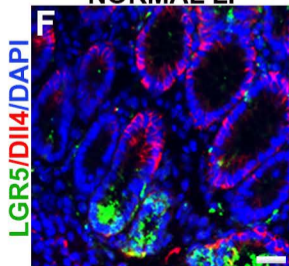

SI ADENOMA

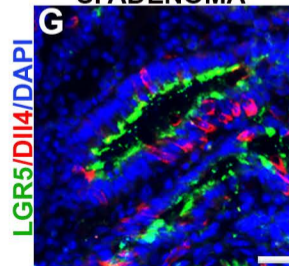

LI ADENOMA

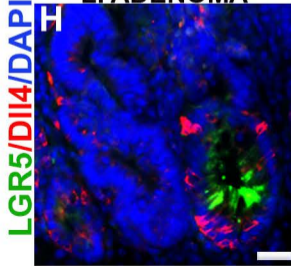

Supplement: MOESM4 [file 11998342]
