# Supplementary material for: Delta-like 4/Notch signaling promotes Apc Min/+ tumor initiation through angiogenic and non-angiogenic related mechanisms
Source: Springer Nature journal article supplement (doi:10.1186/s12885-016-3036-0), 2017-01-13
Supplement: MOESM5 [file 11998342]

**RELATIVE  
EXPRESSION**

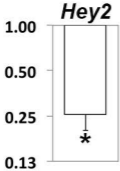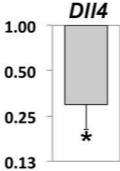

- ApcMin/+ endoDll4-/-
- ApcMin/+ ubiqDll4-/-
