# Supplementary material for: Delta-like 4/Notch signaling promotes Apc Min/+ tumor initiation through angiogenic and non-angiogenic related mechanisms
Source: Springer Nature journal article supplement (doi:10.1186/s12885-016-3036-0), 2017-01-13

H&E - SMALL INTESTINE

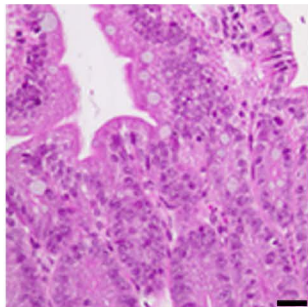

normal

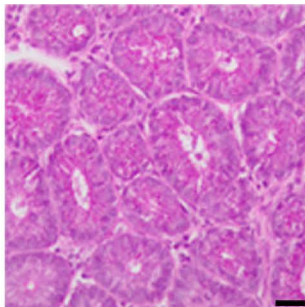

hyperplasia

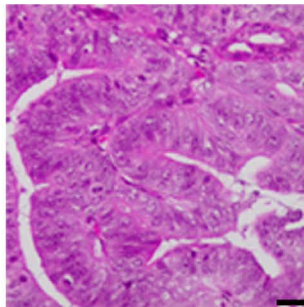

adenoma  
low-grade dysplasia

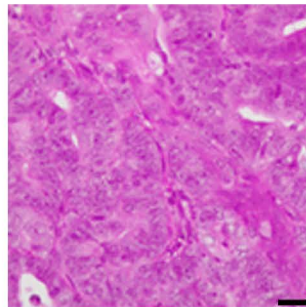

adenoma  
high-grade dysplasia

H&E - LARGE INTESTINE

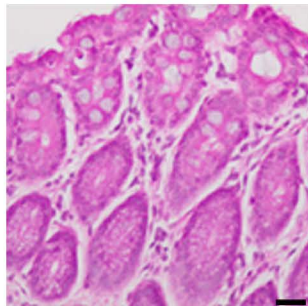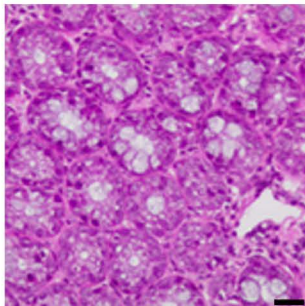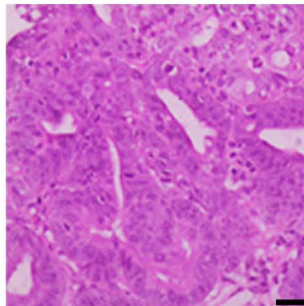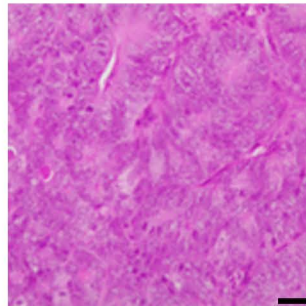

Supplement: MOESM6 [file 11998342]
