# Supplementary material for: Delta-like 4/Notch signaling promotes Apc Min/+ tumor initiation through angiogenic and non-angiogenic related mechanisms
Source: Springer Nature journal article supplement (doi:10.1186/s12885-016-3036-0), 2017-01-13
Supplement: MOESM7 [file 11998342]

**A****SMALL INTESTINAL TUMORS**ACTIVE  $\beta$ -CATENIN ACTIVE  $\beta$ -CATENIN/DAPI

CT

endoDII4<sup>-/-</sup>ubiqDII4<sup>-/-</sup>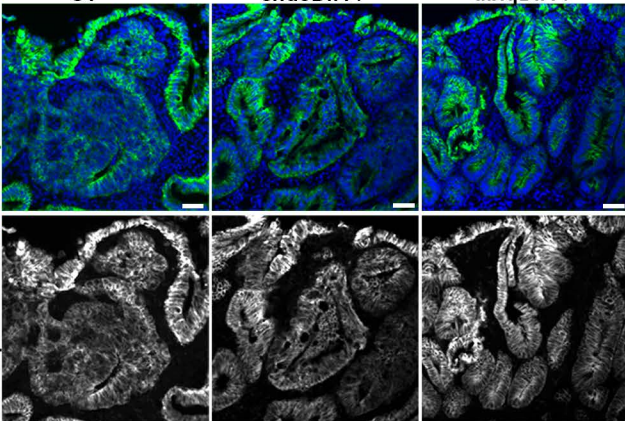**B****LARGE INTESTINAL TUMORS**ACTIVE  $\beta$ -CATENIN ACTIVE  $\beta$ -CATENIN/DAPI

CT

endoDII4<sup>-/-</sup>ubiqDII4<sup>-/-</sup>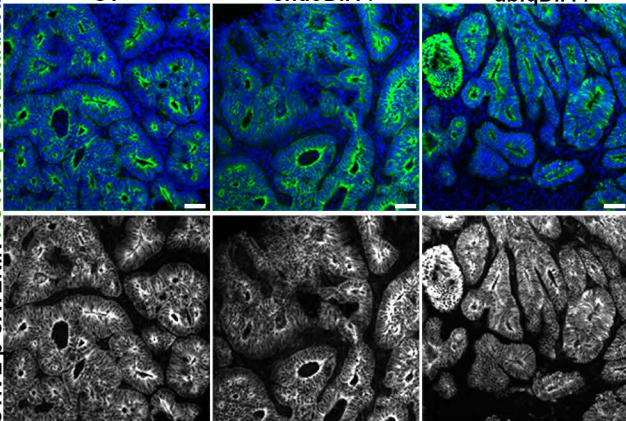**C**TUMOR ACTIVE  
 $\beta$ -CATENIN DENSITY (%)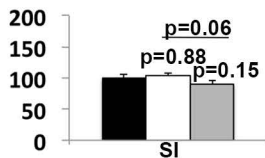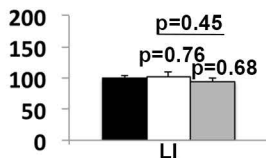

■ ApcMin/+ CT  
 □ ApcMin/+ endoDII4<sup>-/-</sup>  
 ▒ ApcMin/+ ubiqDII4<sup>-/-</sup>
